# Supplementary material for: Identification of key factors driving inflammation-induced sensitization of muscle sensory neurons
Source: PubMed Central journal article supplement (PMC10213456; doi:10.3389/fnins.2023.1147437), 2023-05-12
Supplement: Data_Sheet_1.pdf [file Data_Sheet_1.pdf]

SUPPLEMENTARY MATERIAL

**Identification of key factors driving inflammation-induced sensitization of muscle sensory neurons**

by Sridevi Nagaraja, Shivendra G. Tewari, and Jaques Reifman

## **Inflammation-activated G protein-coupled receptor pathways described in the model**

### *Protein kinase C pathway*

In this mechanism, we described the kinetics of  $G_{\alpha q}$ , which when activated by an inflammatory mediator dissociates into two subunits. One of the active subunits,  $G_{\alpha}$ , recruits inactive phospholipase (PLC) enzyme from the cytosol to form active PLC at the membrane. PLC then hydrolyzes membrane-bound phosphatidylinositol 4,5-bisphosphate ( $PIP_2$ ), leading to the production of two intracellular second messengers, inositol trisphosphate ( $IP_3$ ) and diacylglycerol (DAG). DAG activates protein kinase C (PKC) in the cytosol, and the active PKC ultimately modifies the function of ion channels on the neuronal membrane (Gold and Flake, 2005). In our model, we described the kinetics of the receptor, enzymes, and second messenger molecules using equations and parameters described previously (Bennett et al., 2005; Kapela et al., 2008; Mohan et al., 2017).

### *Protein kinase A pathway*

In this mechanism, we described the kinetics of  $G_{\alpha s}$ , which when activated by an inflammatory mediator dissociates into three subunits. The  $G_{\alpha}$  subunit recruits adjacent membrane-bound adenylate cyclase (AC), which then catalyzes the conversion of ATP in the cytosol to cAMP, which acts as a second messenger and activates protein kinase A (PKA), among other enzymes (Li et al., 2019). In our model, we described the kinetics of each of these receptor subunits, enzymes, and second messenger molecules, using equations and parameters described previously (Lindskog et al., 2006; Leander and Friedman, 2014).

**Table S1. Model variable name, description, and initial value**

| Variable name                    | Description                                           | Initial value         | Variable name                     | Description                                                                                 | Initial value |
|----------------------------------|-------------------------------------------------------|-----------------------|-----------------------------------|---------------------------------------------------------------------------------------------|---------------|
| Nav1.8 <sub>m</sub>              | Activation constant of voltage-gated Nav1.8 channel   | 0                     | TREK <sub>m</sub>                 | Activation constant of two-pore K <sup>+</sup> channel                                      | 0             |
| Nav1.8 <sub>h</sub>              | Inactivation constant of voltage-gated Nav1.8 channel | 1                     | K <sub>a</sub> <sub>n</sub>       | Activation constant of M-type K <sup>+</sup> channel                                        | 0             |
| Nav1.7 <sub>m</sub>              | Activation constant of voltage-gated Nav1.7 channel   | 0                     | K <sub>a</sub> <sub>hfast</sub>   | Fast inactivation constant of M-type K <sup>+</sup> channel                                 | 1             |
| Nav1.7 <sub>h</sub>              | Inactivation constant of voltage-gated Nav1.7 channel | 1                     | K <sub>a</sub> <sub>hslow</sub>   | Slow inactivation constant of M-type K <sup>+</sup> channel                                 | 1             |
| Nav1.9 <sub>m</sub>              | Activation constant of voltage-gated Nav1.9 channel   | 0                     | Kv7 <sub>n</sub>                  | Activation constant of voltage-gated Kv7.2 channel                                          | 0             |
| Nav1.9 <sub>h</sub>              | Inactivation constant of voltage-gated Nav1.9 channel | 1                     | KDR <sub>n</sub>                  | Activation constant of delayed rectifying K <sup>+</sup> channel                            | 0             |
| Piezo <sub>m</sub>               | Fast activation constant of Piezo2 channel            | 0                     | BKCa <sub>n</sub>                 | Activation constant of large-conductance Ca <sup>2+</sup> -activated K <sup>+</sup> channel | 0             |
| Piezo <sub>h</sub>               | Inactivation variable of Piezo2 channel               | 1                     | CaL <sub>m</sub>                  | Activation constant of L-type voltage-gated Ca <sup>2+</sup> channel                        | 0             |
| ASIC3 <sub>m</sub>               | Activation constant of ASIC3 channel                  | 0                     | CaL <sub>h</sub>                  | Inactivation constant of L-type voltage-gated Ca <sup>2+</sup> channel                      | 1             |
| ASIC3 <sub>h</sub>               | Inactivation constant of ASIC3 channel                | 1                     | CaT <sub>m</sub>                  | Activation constant of T-type voltage-gated Ca <sup>2+</sup> channel                        | 0             |
| TRPA1 <sub>m</sub>               | Activation constant of TRPA1 channel                  | 0                     | CaT <sub>h</sub>                  | Inactivation constant of T-type voltage-gated Ca <sup>2+</sup> channel                      | 1             |
| TRPA1 <sub>h</sub>               | Inactivation constant of TRPA1 channel                | 1                     | V <sub>m</sub>                    | Membrane potential                                                                          | -55 mV        |
| [Na <sub>i</sub> <sup>+</sup> ]  | Intracellular Na <sup>+</sup> concentration           | 14 mM                 | [K <sub>i</sub> <sup>+</sup> ]    | Intracellular K <sup>+</sup> concentration                                                  | 140 mM        |
| [Ca <sub>i</sub> <sup>2+</sup> ] | Intracellular free calcium ion concentration          | 5×10 <sup>-5</sup> mM | [Ca <sub>ER</sub> <sup>2+</sup> ] | Calcium concentration in the endoplasmic reticulum                                          | 0.25 mM       |
| IP <sub>3</sub>                  | Intracellular inositol trisphosphate concentration    | 1×10 <sup>-5</sup> mM | hIP <sub>3</sub>                  | Activation constant of the IP <sub>3</sub> receptor                                         | 0.667         |

|                              |                                                           |                       |                               |                                                                                  |                         |
|------------------------------|-----------------------------------------------------------|-----------------------|-------------------------------|----------------------------------------------------------------------------------|-------------------------|
| $G_{\alpha q \text{unphos}}$ | Total number of unphosphorylated $G_{\alpha q}$ receptors | $1.7 \times 10^5$     | $[G_{\alpha s \text{act}}]$   | Concentration of $\alpha$ subunits of $G_{\alpha s}$ receptors                   | 0                       |
| $G_{\alpha q \text{phos}}$   | Total phosphorylated $G_{\alpha q}$ receptors             | 0                     | $[G_{\alpha s \beta \gamma}]$ | Concentration of $\alpha\beta$ subunits of $G_{\alpha s}$ receptors              | 0                       |
| $G_{\alpha q}$               | Number of $\alpha$ subunits of $G_{\alpha q}$ receptors   | 0                     | $[G_{\beta \gamma s}]$        | Concentration of $\beta$ subunits of $G_{\alpha s}$ receptors                    | 0                       |
| [DAG]                        | Intracellular diacylglycerol concentration                | 0 mM                  | [cAMP]                        | Intracellular concentrations of cyclic adenosine monophosphate                   | 0 mM                    |
| PIP <sub>2</sub>             | Total number of phosphatidylinositol 4,5-bisphosphate     | $5 \times 10^7$       | [RC]                          | Intracellular concentration of inactive PKA                                      | $2.2 \times 10^{-4}$ mM |
| PLC                          | Concentration of active phospholipase C                   | 0 mM                  | [R <sub>cAMP</sub> ]          | Intracellular concentration of PKA regulatory subunit                            | 0 mM                    |
| [DAG <sub>PKC</sub> ]        | Intracellular concentration of DAG-PKC complex            | 0 mM                  | [R <sub>CaMP2</sub> ]         | Intracellular concentration of intermediate regulatory PKA catalytic subunit     | 0 mM                    |
| PLC <sub>inact</sub>         | Concentration of membrane-bound inactive phospholipase C  | $1 \times 10^{-2}$ mM | [R <sub>cAMP4</sub> ]         | Intracellular concentration of intermediate regulatory PKA-PKA catalytic subunit | 0 mM                    |
| [PKC <sub>inact</sub> ]      | Intracellular concentration of inactive protein kinase C  | $1 \times 10^{-3}$ mM | [PKA]                         | Intracellular concentration of active protein kinase A                           | 0 mM                    |
| [PKC]                        | Intracellular concentration of protein kinase C           | 0 mM                  | $V_{\text{actNav1.7}}$        | Membrane potential threshold for Nav1.7 activation                               | -25.8 mV                |
| $V_{\text{actNav1.8}}$       | Membrane potential threshold for Nav1.8 activation        | -11.4 mV              | $V_{\text{inactNav1.7}}$      | Membrane potential threshold for Nav1.7 inactivation                             | 55.8 mV                 |
| $V_{\text{inactNav1.8}}$     | Membrane potential threshold for Nav1.8 inactivation      | -24.6 mV              | $M_{\text{actTRPA1}}$         | Mechanical force threshold for TRPA1 activation                                  | 40 mN                   |
| $V_{\text{actKv1.1}}$        | Membrane potential threshold for Kv1.1 activation         | -35 mV                |                               |                                                                                  |                         |

**Table S2. Model parameter number (used in the model), name, description, value, units, and sources**

| P#                                              | Parameter name                   | Description                                                    | Value             | Unit | References              |
|-------------------------------------------------|----------------------------------|----------------------------------------------------------------|-------------------|------|-------------------------|
| <b>Na<sup>+</sup>-Ca<sup>2+</sup> exchanger</b> |                                  |                                                                |                   |      |                         |
| 1                                               | kNCX                             | Constant for NCX                                               | 25.85             |      | (Nagaraja et al., 2021) |
| 2                                               | kNa                              | Half-saturation constant for extracellular [Na <sup>+</sup> ]  | 87.50             | mM   |                         |
| 3                                               | kCa                              | Half-saturation constant for extracellular [Ca <sup>2+</sup> ] | 1.38              | mM   |                         |
| 4                                               | Ima <sub>X</sub> NCX             | Maximum current density                                        | 1×10 <sup>5</sup> | nS   |                         |
| <b>ASIC3 channel</b>                            |                                  |                                                                |                   |      |                         |
| 5                                               | V <sub>h</sub> ASIC              | Half-activation pH for activation factor                       | 6.202             | pH   | (Nagaraja et al., 2021) |
| 6                                               | k <sub>act</sub> ASIC            | Steepness factor of activation                                 | 0.1754            | pH   |                         |
| 7                                               | τ <sub>act</sub> ASIC            | Hill slope of activation factor                                | 5.000             | ms   |                         |
| 8                                               | V <sub>S</sub> ASIC              | Half-inactivation pH for activation factor                     | 7.061             | pH   |                         |
| 9                                               | k <sub>inact</sub> ASIC          | Steepness factor of inactivation                               | 0.0452            | pH   |                         |
| 10                                              | Ima <sub>X</sub> ASIC1β          | Maximum conductance of ASIC channel                            | 15.0              | nS   |                         |
| <b>Na<sup>+</sup>-K<sup>+</sup> pump</b>        |                                  |                                                                |                   |      |                         |
| 11                                              | nH <sub>Na</sub>                 | Hill coefficient for sodium and potassium                      | 1.5               |      | (Nagaraja et al., 2021) |
| 12                                              | K <sub>Na</sub> Na <sub>K</sub>  | Binding constant for intracellular [Na <sup>+</sup> ]          | 14.5              | mM   |                         |
| 13                                              | K <sub>K</sub> Na <sub>K</sub>   | Binding constant for extracellular [K <sup>+</sup> ]           | 1.5               | mM   |                         |
| 14                                              | Ima <sub>X</sub> Na <sub>K</sub> | Maximum current density                                        | 150               | pA   |                         |
| <b>Piezo2 channel</b>                           |                                  |                                                                |                   |      |                         |
| 15                                              | V <sub>h</sub> Piezo             | Half-activation force for inactivating factor                  | 0.9               | mN   | (Nagaraja et al., 2021) |
| 16                                              | V <sub>S</sub> Piezo             | Half-activation force for inactivating factor                  | 0.6               | mN   |                         |
| 17                                              | k <sub>1</sub> inactPiezo        | Steepness factor of inactivation                               | 0.3               | mN   |                         |
| 18                                              | k <sub>2</sub> inactPiezo        | Steepness factor of inactivation                               | 0.1               | mN   |                         |
| 19                                              | τ <sub>act</sub> Piezo           | Time constant for activation factor                            | 1                 | ms   |                         |
| 20                                              | τ <sub>1</sub> inactPiezo        | Time constant for fast inactivation factor                     | 3                 | ms   |                         |
| 21                                              | Ima <sub>X</sub> Piezo           | Maximum conductance of Piezo channel                           | 40                | nS   |                         |
| <b>TREK-1 channel</b>                           |                                  |                                                                |                   |      |                         |
| 22                                              | V <sub>m</sub> TREK              | Half-activation force for activation factor                    | 8                 | mN   | (Nagaraja et al., 2021) |
| 23                                              | k <sub>act</sub> TREK            | Steepness factor of activation                                 | 1                 | mN   |                         |
| 24                                              | τ <sub>act</sub> TREK            | Activation time constant                                       | 1                 | ms   |                         |
| 25                                              | Ima <sub>X</sub> TREK            | Maximum TREK channel conductance                               | 0.5               | nS   |                         |
| <b>TRPA1 channel</b>                            |                                  |                                                                |                   |      |                         |
| 26                                              | k <sub>act</sub> TRPA1           | Steepness factor of activation                                 | 20                | mN   | (Nagaraja et al., 2021) |
| 27                                              | V <sub>h</sub> TRPA1             | Half-activation force for inactivation factor                  | 40                | mN   |                         |
| 28                                              | k <sub>inact</sub> TRPA1         | Steepness factor of inactivation                               | 20                | mN   |                         |
| 29                                              | τ <sub>act</sub> TRPA1           | Activation time constant                                       | 1                 | ms   |                         |
| 30                                              | τ <sub>inact</sub> TRPA1         | Inactivation time constant                                     | 5                 | ms   |                         |
| 31                                              | Ima <sub>X</sub> TRPA1           | Maximum conductance                                            | 15                | nS   |                         |
| <b>Kv7.2</b>                                    |                                  |                                                                |                   |      |                         |
| 32                                              | Ima <sub>X</sub> Kv7             | Maximum Kv7 conductance                                        | 600               | nS   | Modified                |
| 33                                              | k <sub>1</sub> actKv7            | Steepness factor of activation                                 | 0.00395           | mV   | (Nagaraja et al., 2021) |
| 34                                              | V <sub>m</sub> Kv7               | Half-activation membrane potential for activation factor       | 15                | mV   |                         |
| 35                                              | k <sub>2</sub> actKv7            | Steepness factor of activation                                 | 40                | mV   |                         |
| 36                                              | k <sub>1</sub> inactKv7          | Steepness factor of inactivation                               | 0.00395           | mV   |                         |
| 37                                              | k <sub>2</sub> inactKv7          | Steepness factor of inactivation                               | 20                | mV   |                         |

|                                                            |                      |                                                                        |                      |                    |                         |
|------------------------------------------------------------|----------------------|------------------------------------------------------------------------|----------------------|--------------------|-------------------------|
| 38                                                         | $\tau_{act_{Kv7}}$   | Activation time constant                                               | 3                    | ms                 | Modified                |
| <b>KDR channel</b>                                         |                      |                                                                        |                      |                    |                         |
| 39                                                         | $Ima_{X_{KDR}}$      | Maximum KDR conductance                                                | 200                  | nS                 | (Nagaraja et al., 2021) |
| 40                                                         | $\delta_{KDR}$       | Activation factor                                                      | 0.577                | mV                 |                         |
| 41                                                         | $kact_{KDR}$         | Steepness factor of activation                                         | 15.4                 | mV                 |                         |
| 42                                                         | $\tau_{act_{TRPA1}}$ | Activation time constant                                               | 300                  | ms                 | Modified                |
| <b>A-type K<sup>+</sup> channel</b>                        |                      |                                                                        |                      |                    |                         |
| 43                                                         | $Ima_{X_{Ka}}$       | Maximum A-type K <sup>+</sup> channel conductance                      | 6                    | nS                 | Modified                |
| <b>Nav1.8 channel</b>                                      |                      |                                                                        |                      |                    |                         |
| 44                                                         | $Ima_{X_{Nav1.8}}$   | Maximum Nav1.8 channel conductance                                     | 150                  | nS                 | Modified                |
| 45                                                         | $kact_{Nav1.8}$      | Steepness factor of activation                                         | 8.75                 | mV                 | (Nagaraja et al., 2021) |
| 46                                                         | $kinact_{Nav1.8}$    | Steepness factor of inactivation                                       | 5.76                 | mV                 |                         |
| <b>Nav1.9 channel</b>                                      |                      |                                                                        |                      |                    |                         |
| 47                                                         | $Ima_{X_{Nav1.9}}$   | Maximum Nav1.9 channel conductance                                     | 0.5                  | nS                 | Modified                |
| <b>Nav1.7 channel</b>                                      |                      |                                                                        |                      |                    |                         |
| 48                                                         | $Ima_{X_{Nav1.7}}$   | Maximum Nav1.7 channel conductance                                     | 212.0                | nS                 | (Nagaraja et al., 2021) |
| 49                                                         | $kact_{Nav1.7}$      | Steepness factor of activation                                         | 7.8                  | mV                 |                         |
| 50                                                         | $kinact_{Nav1.7}$    | Steepness factor of inactivation                                       | 8.9                  | mV                 |                         |
| <b>Potassium leak channel</b>                              |                      |                                                                        |                      |                    |                         |
| 51                                                         | $Ima_{X_{Kleak}}$    | Leak channel conductance                                               | 0.6                  | nS                 | Modified                |
| <b>Ca<sup>2+</sup>-activated K<sup>+</sup> channel</b>     |                      |                                                                        |                      |                    |                         |
| 52                                                         | $Ima_{X_{BKCa}}$     | Maximum BKCa channel conductance                                       | 10                   | nS                 | (Nagaraja et al., 2021) |
| <b>L-type voltage-gated Ca<sup>2+</sup> channel (VGCC)</b> |                      |                                                                        |                      |                    |                         |
| 53                                                         | $Ima_{X_{LCa}}$      | Maximum L-type VGCC conductance                                        | 10                   | nS                 | (Nagaraja et al., 2021) |
| 54                                                         | $V_{m_{LCa}}$        | Half-activation potential for activation factor                        | -22.8                | mV                 |                         |
| 55                                                         | $kact_{LCa}$         | Steepness factor for activation                                        | 9.85                 | mV                 |                         |
| 56                                                         | $V_{h_{LCa}}$        | Half-activation potential for inactivation factor                      | -34.61               | mV                 |                         |
| 57                                                         | $kinact_{LCa}$       | Steepness factor for inactivation                                      | 5.95                 | mV                 |                         |
| 58                                                         | $\tau_{act_{LCa}}$   | Time constant for activation                                           | 2.38                 | ms                 |                         |
| 59                                                         | $\tau_{inact_{LCa}}$ | Time constant for inactivation                                         | 25.2                 | ms                 |                         |
| <b>T-type voltage-gated Ca<sup>2+</sup> channel</b>        |                      |                                                                        |                      |                    |                         |
| 60                                                         | $V_{m_{TCa}}$        | Half-activation potential for activation factor                        | -25.0                | mV                 | (Nagaraja et al., 2021) |
| 61                                                         | $Kact_{TCa}$         | Steepness factor for activation                                        | -5.0                 | mV                 |                         |
| 62                                                         | $V_{h_{TCa}}$        | Half-activation potential for inactivation factor                      | -38.0                | mV                 |                         |
| 63                                                         | $Kinact_{TCa}$       | Steepness factor for inactivation                                      | -5.0                 | mV                 |                         |
| 64                                                         | $\tau_{act_{TCa}}$   | Time constant for activation                                           | 1                    | ms                 |                         |
| 65                                                         | $\tau_{inact_{TCa}}$ | Time constant for inactivation                                         | 409                  | ms                 |                         |
| 66                                                         | $Ima_{X_{TCa}}$      | Maximum T-type VGCC conductance                                        | 0.099                | nS                 |                         |
| <b>IP<sub>3</sub> receptor (IP<sub>3</sub>R)</b>           |                      |                                                                        |                      |                    |                         |
| 67                                                         | $Ima_{X_{IP3R}}$     | Rate constant of Ca <sup>2+</sup> release by IP <sub>3</sub> R         | 0.00288              | nS                 | (Nagaraja et al., 2021) |
| 68                                                         | $kdis_{IP3}$         | Dissociation constant for IP <sub>3</sub> binding to IP <sub>3</sub> R | 2.7                  | mM                 |                         |
| 69                                                         | $kdisinact_{Ca}$     | Dissociation constant for Ca <sup>2+</sup> inactivation                | $1.0 \times 10^{-4}$ | mM                 |                         |
| 70                                                         | $kdisact_{Ca}$       | Dissociation constant for Ca <sup>2+</sup> activation                  | $1.7 \times 10^{-4}$ | mM                 |                         |
| 71                                                         | $k_{Ca}$             | Rate of Ca <sup>2+</sup> binding to the inhibitory site                | 0.0003               | mM s <sup>-1</sup> |                         |
| <b>PMCA pump</b>                                           |                      |                                                                        |                      |                    |                         |
| 72                                                         | $Ima_{X_{PMCA}}$     | Maximum current                                                        | 7.6418               | pA                 | (Nagaraja et al., 2021) |
| 73                                                         | $KCa_{PMCA}$         | Michaelis constant                                                     | 0.1562               | mM                 |                         |
| <b>SERCA pump</b>                                          |                      |                                                                        |                      |                    |                         |

|                                                             |                   |                                                                |                        |                         |                                            |
|-------------------------------------------------------------|-------------------|----------------------------------------------------------------|------------------------|-------------------------|--------------------------------------------|
| 74                                                          | $K_{CaSERCA}$     | Michaelis constant                                             | $3.94 \times 10^{-4}$  | mN                      | (Nagaraja et al., 2021)                    |
| 75                                                          | $ImaX_{SERCA}$    | Maximum SERCA uptake                                           | 0.002                  | pA                      |                                            |
| <b>Ryanodine receptor (RyR)</b>                             |                   |                                                                |                        |                         |                                            |
| 76                                                          | $K_{CaCICR}$      | Minimum intracellular $[Ca^{2+}]$ for RyR activation           | $1.2 \times 10^{-4}$   | mM                      | (Nagaraja et al., 2021)                    |
| 77                                                          | $ImaX_{CICR}$     | Rate constant of $Ca^{2+}$ release by RyR                      | $5.03 \times 10^{-4}$  | pA                      |                                            |
| 78                                                          | $kd_{CICRCa}$     | Dissociation constant for $Ca^{2+}$ inactivation               | 0.0501                 | mM                      |                                            |
| <b>Endoplasmic reticulum (ER) <math>Ca^{2+}</math> leak</b> |                   |                                                                |                        |                         |                                            |
| 79                                                          | $ImaX_{ERleak}$   | Maximum passive leak from ER                                   | $3.03 \times 10^{-5}$  | pA                      | (Nagaraja et al., 2021)                    |
| <b>Calcium buffering in ER</b>                              |                   |                                                                |                        |                         |                                            |
| 80                                                          | $K_{CQSN}$        | Binding affinity of calsequestrin                              | 1.21                   | mM                      | (Nagaraja et al., 2021)                    |
| 81                                                          | $CQSN$            | Concentration of calsequestrin in ER                           | 16.0                   | mM                      |                                            |
| <b>Protein kinase C (PKC) activation and signaling</b>      |                   |                                                                |                        |                         |                                            |
| 82                                                          | RTG               | Total unphosphorylated $G_{aq}$ receptors                      | $2.00 \times 10^4$     |                         | (Bennett et al., 2005; Mohan et al., 2017) |
| 83                                                          | $K_{IG}$          | Unphosphorylated receptor dissociation constant                | 0.01                   | mM                      |                                            |
| 84                                                          | $K_{2G}$          | Phosphorylated receptor dissociation constant                  | 0.2                    | mM                      |                                            |
| 85                                                          | $k_{rG}$          | Receptor recycling rate                                        | $1.75 \times 10^{-7}$  | $ms^{-1}$               |                                            |
| 86                                                          | $k_{pG}$          | Receptor phosphorylation rate                                  | $1.00 \times 10^{-3}$  | $ms^{-1}$               |                                            |
| 87                                                          | $k_{eG}$          | Receptor endocytosis rate                                      | $6.00 \times 10^{-6}$  | $ms^{-1}$               |                                            |
| 88                                                          | $\epsilon_{IG}$   | Fraction of mobile receptors                                   | 0.85                   |                         |                                            |
| 89                                                          | GTG               | Total activated $G_{aq}$ receptors                             | $1.00 \times 10^5$     |                         |                                            |
| 90                                                          | $k_{degG}$        | $IP_3$ degradation rate                                        | 0.00125                | $ms^{-1}$               |                                            |
| 91                                                          | $k_{aG}$          | $G_{aq}$ subunit activation rate                               | $1.70 \times 10^{-4}$  | $ms^{-1}$               |                                            |
| 92                                                          | $k_{dG}$          | $G_{aq}$ subunit deactivation rate                             | $1.50 \times 10^{-3}$  | $ms^{-1}$               |                                            |
| 93                                                          | PIP <sub>2T</sub> | Total PIP <sub>2</sub> molecules                               | $5.00 \times 10^7$     |                         |                                            |
| 94                                                          | $r_{rG}$          | PIP <sub>2</sub> replenishment rate                            | $1.50 \times 10^{-5}$  | $ms^{-1}$               |                                            |
| 95                                                          | $k_{cG}$          | Dissociation constant for $Ca^{2+}$ binding to PLC             | $4.00 \times 10^{-4}$  | mM                      |                                            |
| 96                                                          | $\alpha_G$        | Effective signal gain parameter                                | $2.78 \times 10^{-8}$  | $ms^{-1}$               |                                            |
| 97                                                          | $\gamma_G$        | Coefficient to convert number of molecules to concentration    | $6.00 \times 10^8$     |                         |                                            |
| 98                                                          | $k_{PLCact}$      | PLC activation rate                                            | 2.2967                 | $mM^{-1} \cdot ms^{-1}$ | Modified                                   |
| 99                                                          | $k_{PLCinact}$    | PLC inactivation rate                                          | 0.3389                 | $ms^{-1}$               |                                            |
| 100                                                         | $k_{hyd}$         | Rate of diacylglycerol (DAG) activation by PIP <sub>2</sub>    | $4.99 \times 10^{-10}$ | $mM^{-2} \cdot ms^{-1}$ | (Mohan et al., 2017)                       |
| 101                                                         | $k_{deg}$         | DAG degradation rate                                           | 0.0499                 | $ms^{-1}$               | Modified                                   |
| 102                                                         | $k_{actPKC}$      | Rate of PKC activation by DAG                                  | 0.20                   | $mM^{-1} \cdot ms^{-1}$ |                                            |
| 103                                                         | $k_{inactPKC}$    | PKC inactivation rate                                          | 0.0022                 | $ms^{-1}$               |                                            |
| 104                                                         | $k_{off}$         | Rate of dissociation of DAG-PKC complex                        | $8.00 \times 10^{-3}$  | $ms^{-1}$               |                                            |
| 105                                                         | $k_{dp}$          | Rate of association of DAG and PKC                             | 0.0112                 | $ms^{-1}$               |                                            |
| <b>Protein kinase A (PKA) activation and signaling</b>      |                   |                                                                |                        |                         |                                            |
| 106                                                         | $AC_{tot}$        | Total basal concentration of adenylyl cyclase                  | $2.90 \times 10^{-5}$  | mM                      | (Leander and Friedman, 2014)               |
| 107                                                         | $GPCR_{tot}$      | Basal concentration of total phosphorylated $G_{as}$ receptors | $9.70 \times 10^{-6}$  | mM                      |                                            |
| 108                                                         | $G_{astot}$       | Total activated of $G_{as}$ subunits                           | 0.0061                 |                         |                                            |
| 109                                                         | $k_{EPdiss}$      | Dissociation rate constant                                     | $1.90 \times 10^{-5}$  |                         |                                            |
| 110                                                         | $k1_{Gas}$        | $G_{as}$ activation rate                                       | $5.00 \times 10^{-3}$  | $ms^{-1}$               |                                            |
| 111                                                         | $k2_{Gas}$        | $G_{as}$ hydrolysis rate                                       | $7.00 \times 10^{-5}$  | $ms^{-1}$               |                                            |
| 112                                                         | $k3_{Gas}$        | $G_{as}$ - $\beta\gamma$ association rate                      | 0.7                    | $mM^{-1} \cdot ms^{-1}$ |                                            |
| 113                                                         | $k4_{Gas}$        | $G_{as}$ - $\beta\gamma$ disassociation rate                   | $1.89 \times 10^{-5}$  | $ms^{-1}$               |                                            |
| 114                                                         | $k_{ACdiss}$      | Dissociation rate constant                                     | $3.60 \times 10^{-6}$  | mM                      |                                            |

|                                             |                                |                                                  |                       |                                       |                         |
|---------------------------------------------|--------------------------------|--------------------------------------------------|-----------------------|---------------------------------------|-------------------------|
| 115                                         | $k_{AC\beta\gamma\text{diss}}$ | Disassociation constant for AC and $\beta\gamma$ | $9.00 \times 10^{-5}$ | mM                                    | (Lindskog et al., 2006) |
| 116                                         | $k_{5\text{Gas}}$              | Active cAMP production rate                      | 0.0105                | $\text{ms}^{-1}$                      |                         |
| 117                                         | $k_{6\text{Gas}}$              | Basal cAMP production rate                       | $3.5 \times 10^{-4}$  | $\text{ms}^{-1}$                      |                         |
| 118                                         | $k_{\text{degeAMP}}$           | cAMP degradation rate                            | 0.013                 | $\text{ms}^{-1}$                      |                         |
| 119                                         | $K_{\text{fPKA}}$              | Rate of association of PKA and cAMP              | $1.30 \times 10^{-2}$ | $\text{mM}^{-2} \cdot \text{ms}^{-1}$ |                         |
| 120                                         | $K_{\text{bPKA}}$              | Rate of disassociation of RCcAMP2                | $6.00 \times 10^{-6}$ | $\text{ms}^{-1}$                      |                         |
| 121                                         | $k_{\text{f}_9}$               | Rate of association of cAMP and RCcAMP2          | $1.73 \times 10^{-2}$ | $\text{mM}^{-2} \cdot \text{ms}^{-1}$ |                         |
| 122                                         | $k_{\text{b}_9}$               | Rate of disassociation of RCcAMP4                | $6.00 \times 10^{-5}$ | $\text{ms}^{-1}$                      |                         |
| 123                                         | $k_{\text{f}_{10}}$            | Rate of disassociation of RC and RCcAMP          | $8.00 \times 10^{-6}$ | $\text{ms}^{-1}$                      |                         |
| 124                                         | $k_{\text{b}_{10}}$            | Rate of association of RC and RCcAMP             | 4.8                   | $\text{mM}^{-2} \cdot \text{ms}^{-1}$ |                         |
| <b>TRPA1 phosphorylation by PKA and PKC</b> |                                |                                                  |                       |                                       |                         |
| 125                                         | $k_{\text{halfPKC}}$           | Phosphorylation factor of PKC                    | $5.47 \times 10^{-6}$ | mV                                    | Modified                |
| 126                                         | $k_{\text{slopePKC}}$          | Steepness factor of PKC                          | $1.84 \times 10^{-5}$ | mV                                    |                         |
| 127                                         | $k_{\text{halfPKA}}$           | Phosphorylation factor of PKA                    | $3.47 \times 10^{-5}$ | mV                                    |                         |
| 128                                         | $k_{\text{slopePKA}}$          | Steepness factor of PKA                          | $8.39 \times 10^{-6}$ | mV                                    |                         |
| 129                                         | $\tau_{\text{TRPA1phos}}$      | TRPA1 phosphorylation time constant              | $5 \times 10^6$       | $\text{ms}^{-1}$                      |                         |
| 130                                         | $\tau_{\text{Kv1.1phos}}$      | Kv1.1 phosphorylation time constant              | $5 \times 10^6$       | $\text{ms}^{-1}$                      |                         |
| 131                                         | $\tau_{\text{Navphos}}$        | Nav1.8 and Nav1.7 phosphorylation time constant  | $5 \times 10^6$       | $\text{ms}^{-1}$                      |                         |



**Figure S1**

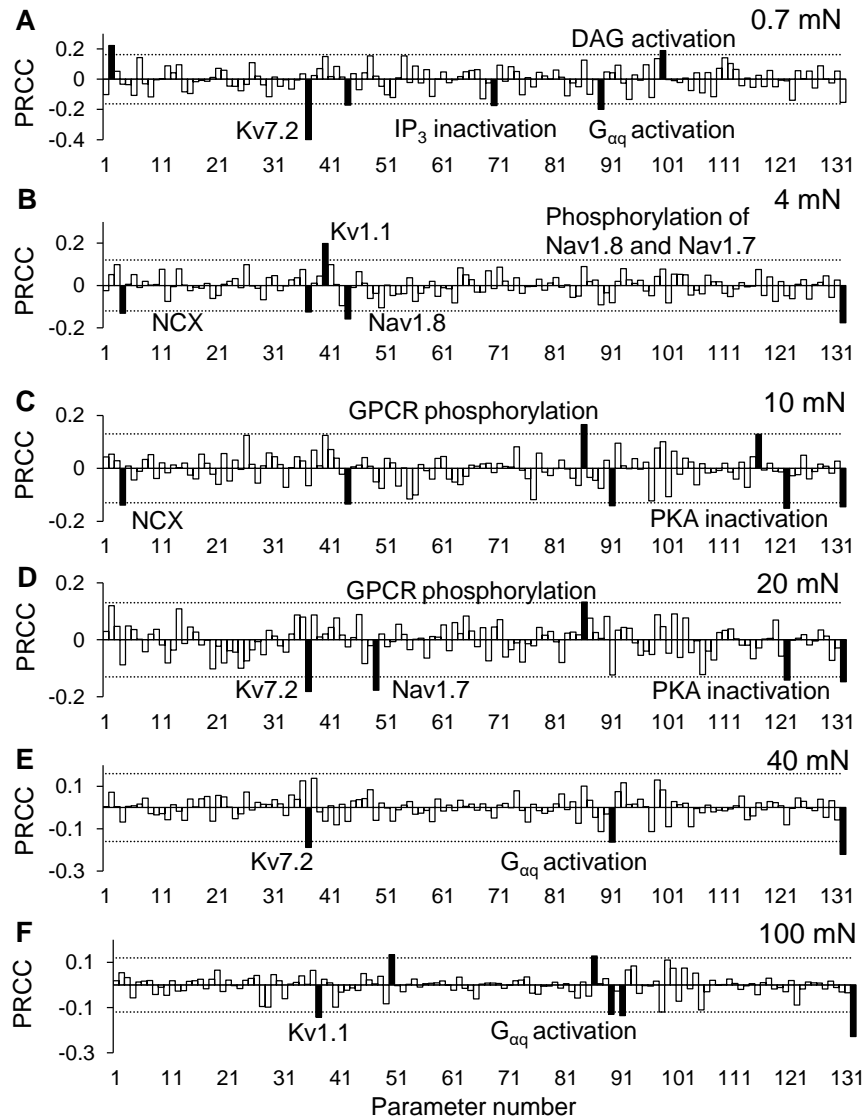

**Figure S1.** Partial rank correlation coefficient (PRCC) analysis identified key proteins and processes for action potential (AP) regulation. The bars show the PRCC values between the 131 model parameters and the fold changes in the number of APs fired after the separate application of a series of six mechanical forces of (A) 0.7 mN, (B) 4 mN, (C) 10 mN, (D) 20 mN, (E) 40 mN, and (F) 100 mN computed from simulations in which inflammation increased AP firing. The PRCCs above their respective thresholds (dotted horizontal lines) that were statistically significant (i.e.,  $p < 0.01$ ) are indicated by solid black bars, and the labels of the bars show the ion channels/ion pumps or the rates of intracellular processes that these parameters describe in the model. The number of simulations in which the number of APs fired increased after inflammation were 306, 837, 1,007, 529, 1,319, and 2,575 for the applied mechanical forces of 0.7, 4, 10, 20, 40, and 100 mN, respectively. DAG, diacylglycerol; GPCR, G protein-coupled receptor; IP<sub>3</sub>, inositol trisphosphate.

**Figure S2**

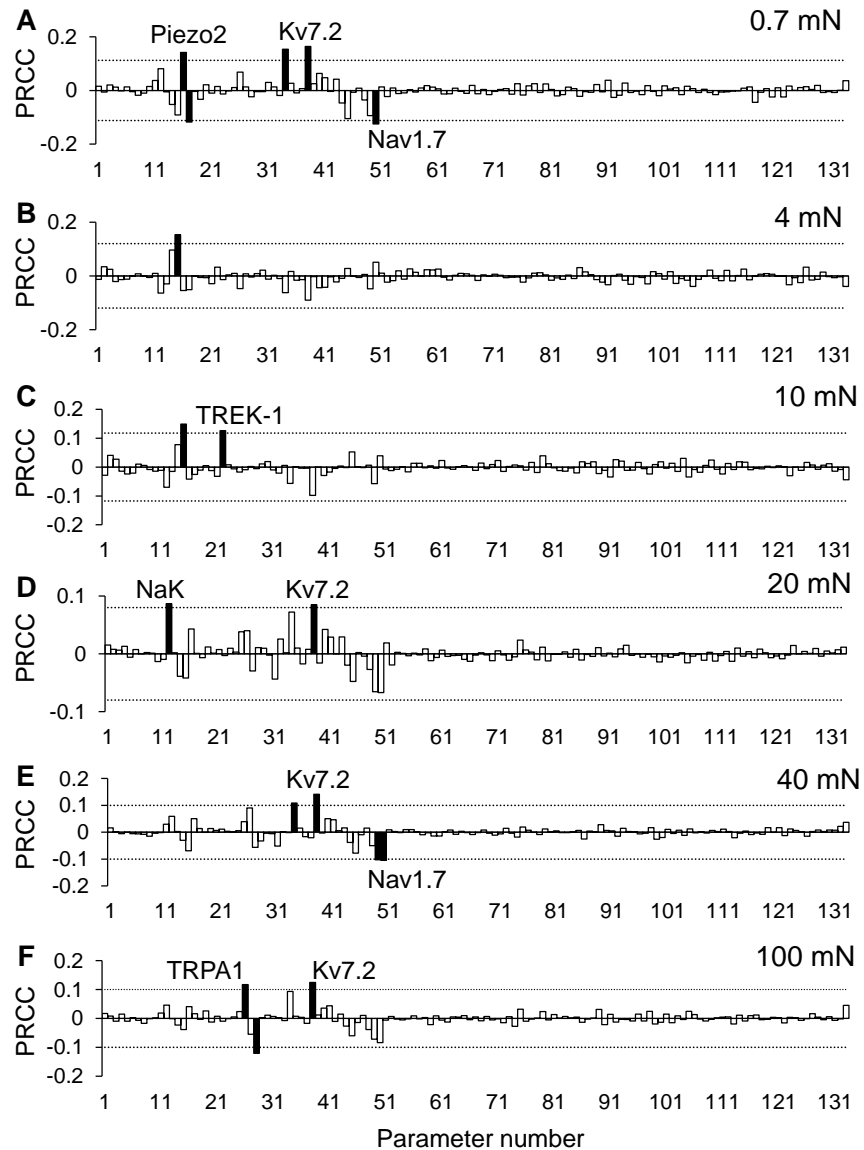

**Figure S2.** Partial rank correlation coefficient (PRCC) analysis identified key proteins and processes for action potential (AP) regulation. The bars show the PRCC values between the 131 model parameters and the fold changes in the number of APs fired after the separate application of a series of six mechanical forces of (A) 0.7 mN, (B) 4 mN, (C) 10 mN, (D) 20 mN, (E) 40 mN, and (F) 100 mN computed from simulations in which inflammation decreased AP firing. The PRCCs above their respective thresholds (dotted horizontal lines) that were statistically significant (i.e.,  $p < 0.01$ ) are indicated by solid black bars, and the labels of the bars show the ion channels/ion pumps or the rates of intracellular processes that these parameters describe in the model. The number of simulations in which the number of APs fired decreased after inflammation were 6,134, 13,625, 13,626, 14,484, 14,311, and 17,509 for the applied mechanical forces of 0.7, 4, 10, 20, 40, and 100 mN, respectively.

**Table S3. List of Bhattacharyya coefficients for the model's 131 parameters, computed using the parameter distributions in the simulations of sensitized and non-sensitized neurons**

| Parameter number | Bhattacharyya coefficient | Parameter number | Bhattacharyya coefficient | Parameter number | Bhattacharyya coefficient |
|------------------|---------------------------|------------------|---------------------------|------------------|---------------------------|
| 1                | 0.994076                  | 45               | 0.986364                  | 89               | 0.988439                  |
| 2                | 0.992218                  | 46               | 0.993500                  | 90               | 0.992524                  |
| 3                | 0.992158                  | 47               | 0.993177                  | 91               | 0.986838                  |
| 4                | 0.993218                  | 48               | 0.990526                  | 92               | 0.990516                  |
| 5                | 0.993584                  | 49               | 0.948802                  | 93               | 0.989588                  |
| 6                | 0.993606                  | 50               | 0.972886                  | 94               | 0.991931                  |
| 7                | 0.993911                  | 51               | 0.992912                  | 95               | 0.992648                  |
| 8                | 0.994278                  | 52               | 0.992366                  | 96               | 0.992518                  |
| 9                | 0.991266                  | 53               | 0.989942                  | 97               | 0.991408                  |
| 10               | 0.993573                  | 54               | 0.993005                  | 98               | 0.988138                  |
| 11               | 0.992801                  | 55               | 0.993110                  | 99               | 0.988453                  |
| 12               | 0.985838                  | 56               | 0.993234                  | 100              | 0.990976                  |
| 13               | 0.993620                  | 57               | 0.993576                  | 101              | 0.990088                  |
| 14               | 0.986760                  | 58               | 0.994211                  | 102              | 0.989887                  |
| 15               | 0.965129                  | 59               | 0.993072                  | 103              | 0.992670                  |
| 16               | 0.992167                  | 60               | 0.992288                  | 104              | 0.990117                  |
| 17               | 0.990052                  | 61               | 0.994663                  | 105              | 0.991441                  |
| 18               | 0.990342                  | 62               | 0.991923                  | 106              | 0.993061                  |
| 19               | 0.991623                  | 63               | 0.994803                  | 107              | 0.991699                  |
| 20               | 0.993535                  | 64               | 0.993847                  | 108              | 0.992943                  |
| 21               | 0.992141                  | 65               | 0.992111                  | 109              | 0.992606                  |
| 22               | 0.992966                  | 66               | 0.992985                  | 110              | 0.994406                  |
| 23               | 0.993625                  | 67               | 0.993741                  | 111              | 0.993511                  |
| 24               | 0.992183                  | 68               | 0.993265                  | 112              | 0.991349                  |
| 25               | 0.992039                  | 69               | 0.992306                  | 113              | 0.993604                  |
| 26               | 0.984754                  | 70               | 0.992138                  | 114              | 0.993472                  |
| 27               | 0.992974                  | 71               | 0.992832                  | 115              | 0.992237                  |
| 28               | 0.992090                  | 72               | 0.992988                  | 116              | 0.992598                  |
| 29               | 0.992472                  | 73               | 0.994244                  | 117              | 0.994399                  |
| 30               | 0.992483                  | 74               | 0.993390                  | 118              | 0.993215                  |
| 31               | 0.991196                  | 75               | 0.990438                  | 119              | 0.993589                  |
| 32               | 0.991266                  | 76               | 0.993124                  | 120              | 0.993410                  |
| 33               | 0.993417                  | 77               | 0.992430                  | 121              | 0.992297                  |
| 34               | 0.976274                  | 78               | 0.992000                  | 122              | 0.993004                  |
| 35               | 0.993259                  | 79               | 0.991922                  | 123              | 0.989626                  |
| 36               | 0.994324                  | 80               | 0.990773                  | 124              | 0.992886                  |
| 37               | 0.990319                  | 81               | 0.993283                  | 125              | 0.992653                  |
| 38               | 0.971447                  | 82               | 0.993563                  | 126              | 0.993665                  |
| 39               | 0.991562                  | 83               | 0.991318                  | 127              | 0.993665                  |
| 40               | 0.990489                  | 84               | 0.991416                  | 128              | 0.993471                  |
| 41               | 0.992677                  | 85               | 0.991646                  | 129              | 0.992239                  |
| 42               | 0.993160                  | 86               | 0.984570                  | 130              | 0.991636                  |
| 43               | 0.993396                  | 87               | 0.994010                  | 131              | 0.977239                  |
| 44               | 0.991408                  | 88               | 0.992848                  |                  |                           |

## Figure S3

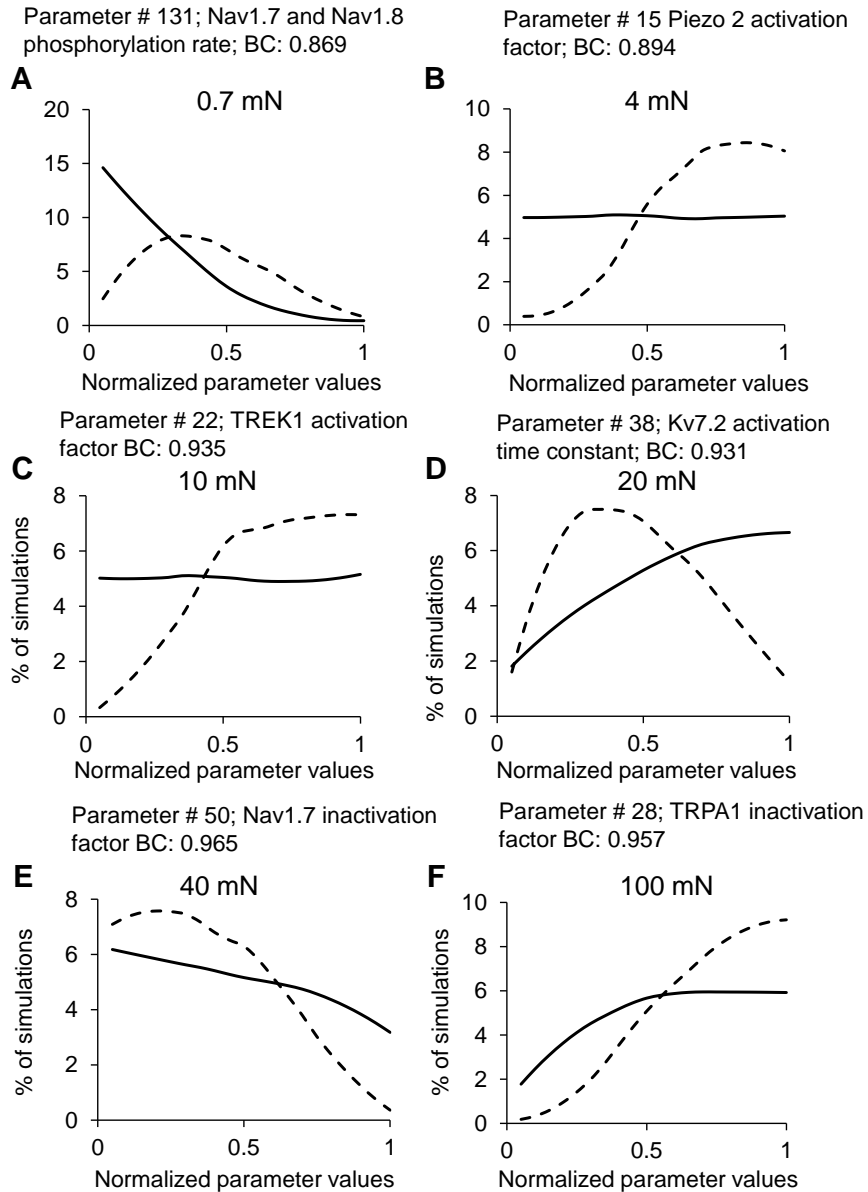

**Figure S3.** Distributions of the values of parameters that demonstrated the lowest Bhattacharyya coefficients (BC) across the sensitized neuron group simulations (solid lines) and the non-sensitized neuron group simulations (dashed lines), where the neuron groups were classified based on the number of APs fired after (A) 0.7 mN, (B) 4 mN, (C) 10 mN, (D) 20 mN, (E) 40 mN, and (F) 100 mN forces were applied as the input. The  $x$ -axis designates the normalized values of the parameters, and the  $y$ -axis represents the percentage of simulations in each neuron group in which the parameter values fell within a particular range (described in the “Methods” section). The number of simulations in the sensitized and non-sensitized groups were, respectively, 306 and 6,134 for 0.7 mN; 837 and 13,625 for 4 mN; 1,007 and 13,326 for 10 mN; 529 and 14,484 for 20 mN; 1,319 and 14,311 for 40 mN; and 2,575 and 17,509 for 100 mN of mechanical force.

**Table S4. Total number of APs fired before and after the addition of an inflammatory mediator and the associated fold changes for 14 different modifications**

|                                                                                 | <b>#APs fired before inflammation</b> | <b>#APs fired after inflammation</b> | <b>Fold change</b> |
|---------------------------------------------------------------------------------|---------------------------------------|--------------------------------------|--------------------|
| <b>Knocking out the channel or down-regulating the biochemical processes</b>    |                                       |                                      |                    |
| Nominal model                                                                   | 14                                    | 114                                  | 8.14               |
| TRPA1 KO                                                                        | 12                                    | 59                                   | 4.92               |
| Piezo2 KO                                                                       | 6                                     | 108                                  | 18.00              |
| Kv7.2 KO                                                                        | 53                                    | 513                                  | 9.68               |
| GPCR phosphorylation                                                            | 14                                    | 106                                  | 7.57               |
| G <sub>αq</sub> activation                                                      | 14                                    | 804                                  | 57.43              |
| PKA inactivation                                                                | 14                                    | 174                                  | 12.43              |
| Nav1.8 and Nav1.7 phosphorylation                                               | 14                                    | 169                                  | 12.07              |
| <b>Increasing channel expression or up-regulating the biochemical processes</b> |                                       |                                      |                    |
| Nominal model                                                                   | 14                                    | 114                                  | 8.14               |
| TRPA1 2-fold increase                                                           | 6                                     | 12                                   | 2.00               |
| Piezo2 2-fold increase                                                          | 22                                    | 126                                  | 5.73               |
| Kv7.2 2-fold increase                                                           | 8                                     | 60                                   | 7.50               |
| GPCR phosphorylation                                                            | 14                                    | 788                                  | 56.29              |
| G <sub>αq</sub> activation                                                      | 14                                    | 119                                  | 8.50               |
| PKA inactivation                                                                | 14                                    | 33                                   | 2.36               |
| Nav1.8 and Nav1.7 phosphorylation                                               | 14                                    | 71                                   | 5.07               |

# Model equations for description of transmembrane currents, endoplasmic reticulum (ER) mechanisms, Nernst potentials, and mass balance of intracellular $\text{Na}^+$ , $\text{K}^+$ , and $\text{Ca}^{2+}$ ions

## Transmembrane mechanisms

### 1. Voltage-gated Nav1.8 channel

$$\frac{d\text{Nav1.8}_m}{dt} = \frac{-\text{Nav1.8}_m + \text{Nav1.8}_{\text{mss}}}{\tau_{\text{mNav1.8}}}$$

$$\frac{d\text{Nav1.8}_h}{dt} = \frac{-\text{Nav1.8}_h + \text{Nav1.8}_{\text{hss}}}{\tau_{\text{hNav1.8}}}$$

$$a_{\text{m}_r} = \frac{7.2}{1 + e^{((V_m - 0.063)/7.86)}}$$

$$b_{\text{m}_r} = \frac{7.4}{1 + e^{((V_m + 53.06)/19.34)}}$$

$$a_{\text{h}_r} = 0.003 + \frac{1.63}{1 + e^{((V_m + 68.5)/10.01)}}$$

$$b_{\text{h}_r} = 0.81 - \frac{0.81}{1 + e^{((V_m - 11.44)/13.12)}}$$

$$\tau_{\text{mNav1.8}} = \frac{1}{a_{\text{m}_r} + b_{\text{m}_r}}$$

$$\tau_{\text{hNav1.8}} = \frac{1}{a_{\text{h}_r} + b_{\text{h}_r}}$$

$$\text{Nav1.8}_{\text{mss}} = \frac{1}{1 + e^{\left(\frac{V_{\text{mNav1.8}} - V_m}{k_{\text{actNav1.8}}}\right)}}$$

$$\text{Nav1.8}_{\text{hss}} = \frac{1}{1 + e^{\left(\frac{V_m + V_{\text{hNav1.8}}}{k_{\text{inactNav1.8}}}\right)}}$$

$$I_{\text{Nav1.8}} = \text{Imax}_{\text{Nav1.8}} \cdot \text{Nav1.8}_m^2 \cdot \text{Nav1.8}_h \cdot (V_m - V_{\text{Na}})$$

### 2. Voltage-gated Nav1.9 channel

$$\frac{d\text{Nav1.9}_m}{dt} = \frac{-\text{Nav1.9}_m + \text{Nav1.9}_{\text{mss}}}{\tau_{\text{mNav1.9}}}$$

$$\frac{d\text{Nav1.9}_h}{dt} = \frac{-\text{Nav1.9}_h + \text{Nav1.9}_{\text{hss}}}{\tau_{\text{hNav1.9}}}$$

$$\text{am}_{1.9} = \frac{1.548}{1 + e^{((V_m - 11.01) / -14.871)}}$$

$$\text{bm}_{1.9} = \frac{8.685}{1 + e^{((V_m + 112.4) / 22.9)}}$$

$$\text{ah}_{1.9} = \frac{0.2574}{1 + e^{((V_m + 63.264) / 3.719)}}$$

$$\text{bh}_{1.9} = \frac{0.54}{1 + e^{((V_m + 0.28) / -0.093)}}$$

$$\tau_{\text{mNav1.9}} = \frac{1}{\text{am}_{1.9} + \text{bm}_{1.9}}$$

$$\tau_{\text{hNav1.9}} = \frac{1}{\text{ah}_{1.9} + \text{bh}_{1.9}}$$

$$\text{Nav1.9}_{\text{mss}} = \frac{\text{am}_{1.9}}{\text{am}_{1.9} + \text{bm}_{1.9}}$$

$$\text{Nav1.9}_{\text{hss}} = \frac{\text{ah}_{1.9}}{\text{ah}_{1.9} + \text{bh}_{1.9}}$$

$$I_{\text{Nav1.9}} = I_{\text{maxNav1.9}} \cdot \text{Nav1.9}_m^2 \cdot \text{Nav1.9}_h \cdot (V_m - V_{\text{Na}})$$

### 3. Voltage-gated Nav1.7 channel

$$\frac{d\text{Nav1.7}_m}{dt} = \frac{-\text{Nav1.7}_m + \text{Nav1.7}_{\text{mss}}}{\tau_{\text{mNav1.7}}}$$

$$\frac{d\text{Nav1.7}_h}{dt} = \frac{-\text{Nav1.7}_h + \text{Nav1.7}_{\text{hss}}}{\tau_{\text{hNav1.7}}}$$

$$\text{am}_{1.7} = \frac{15.5}{1 + e^{((V_m - 5) / -12.08)}}$$

$$\text{bm}_{1.7} = \frac{35.2}{1 + e^{((V_m + 72.7) / 16.7)}}$$

$$\text{ah}_{1.7} = 0.24 \cdot e^{(-\frac{V_m + 115}{46.33})}$$

$$\text{bh}_{1.7} = 4.32 \cdot (1 + e^{(\frac{V_m - 11.8}{-12})})$$

$$\tau_{mNav1.7} = \frac{1}{am_{1.7} + bm_{1.7}}$$

$$\tau_{hNav1.7} = \frac{1}{ah_{1.7} + bh_{1.7}}$$

$$Nav1.7_{mss} = \frac{1}{1 + e^{\left(\frac{V_{mNav1.7} - V_m}{k_{actNav1.7}}\right)}}$$

$$Nav1.7_{hss} = \frac{1}{1 + e^{\left(\frac{V_m + V_{hNav1.7}}{k_{inactNav1.7}}\right)}}$$

$$I_{Nav1.7} = I_{maxNav1.7} \cdot Nav1.7_m^2 \cdot Nav1.7_h \cdot (V_m - V_{Na})$$

#### 4. Mechanosensitive Piezo2 channel

$$\frac{dPiezo_m}{dt} = \frac{Piezo_m + Piezo_{mss}}{\tau_{actPiezo}}$$

$$\frac{dPiezo_h}{dt} = \frac{Piezo_h + Piezo_{hss}}{\tau_{inactPiezo}}$$

$$Piezo_{mss} = \frac{1}{1 + e^{\left(\frac{V_{mpiezo} - Mechforce}{k_{actPiezo}}\right)}}$$

$$Piezo_{hss} = 1 - \frac{1}{1 + e^{\left(\frac{V_{hpiezo} - Mechforce}{k_{inactPiezo}}\right)}}$$

$$I_{PiezoNa} = I_{maxPiezo} \cdot Piezo_m^4 \cdot Piezo_h^2 \cdot (V_m - V_{Na})$$

$$I_{PiezoCa} = I_{maxPiezo} \cdot Piezo_m^4 \cdot Piezo_h^2 \cdot (V_m - V_{Ca})$$

$$I_{Piezo} = I_{PiezoNa} + I_{PiezoCa}$$

#### 5. Mechanosensitive TRPA1 channel

$$\frac{dTRPA1_m}{dt} = \frac{-TRPA1_m + TRPA1_{mss}}{\tau_{actTRPA1}}$$

$$\frac{dTRPA1_h}{dt} = \frac{-TRPA1_h + TRPA1_{hss}}{\tau_{inactTRPA1}}$$

$$TRPA1_{mss} = \frac{1}{1 + e^{\left(\frac{V_{mTRPA1} - Mechforce}{k_{actTRPA1}}\right)}}$$



$$TRPA1_{hss} = 1 - \frac{1}{1 + e^{\left(\frac{V_{hTRPA1} - Mechforce}{k_{inactTRPA1}}\right)}}$$

$$I_{TRPA1} = I_{maxTRPA1} \cdot TRPA1_m^2 \cdot TRPA1_h \cdot (V_m - V_{Na})$$

## 6. Mechanosensitive two-pore TREK-1 channel

$$\frac{dTREK_m}{dt} = \frac{-TREK_m + TREK_{mss}}{\tau_{actTREK}}$$

$$TREK_{mss} = \frac{1}{1 + e^{\left(\frac{V_{mTREK} - Mechforce}{k_{actTREK}}\right)}}$$

$$I_{TREK1} = I_{maxTREK} \cdot TREK_m^2 \cdot (V_m - V_K)$$

Mechforce = 0.7, 4, 10, 20, 40, or 100 mN

## 7. pH-mediated ASIC3 channel

$$\frac{dASIC3_m}{dt} = \frac{-ASIC3_m + ASIC3_{mss}}{\tau_{actASIC3}}$$

$$\frac{dASIC3_h}{dt} = \frac{-ASIC3_h + ASIC3_{hss}}{\tau_{inactASIC3}}$$

$$\tau_{inactASIC3} = 197.36 \cdot pH^2 - 1738.9 \cdot pH + 3968.1$$

$$ASIC3_{mss} = \frac{1}{1 + e^{\left(\frac{V_{mASIC3} - pH}{k_{actASIC3}}\right)}}$$

$$ASIC3_{hss} = 1 - \frac{1}{1 + e^{\left(\frac{V_{hASIC3} - pH}{k_{inactASIC3}}\right)}}$$

$$I_{ASIC3} = I_{maxASIC3} \cdot ASIC3_m \cdot ASIC3_h \cdot (V_m - V_{Na})$$

pH = 7.5

## 8. Voltage-gated Kv7.2 channel

$$\frac{dKv7_n}{dt} = \frac{-Kv7_n + Kv7_{nss}}{\tau_{nKv7}}$$

$$an_{Kv7} = k_{lactKv7} \cdot e^{\left(\frac{V_m + V_{mKv7}}{k_{2actKv7}}\right)}$$

$$bn_{Kv7} = k_{lin} \text{inact}_{Kv7} \cdot e^{-\left(\frac{V_m + V_{mKv7}}{k_{2inactKv7}}\right)}$$

$$\tau_{nKv7} = \frac{1}{an_{Kv7} + bn_{Kv7}}$$

$$Kv7_{nss} = \frac{1}{1 + e^{\left(\frac{-V_m - V_{mKv7}}{\tau_{actKv7}}\right)}}$$

$$I_{Kv7.2} = I_{maxKv7} \cdot Kv7_n^2 \cdot (V_m - V_K)$$

### 9. Delayed-rectifier Kv1.1 K<sup>+</sup> channel

$$\frac{dKv1.1_n}{dt} = \frac{-Kv1.1_n + Kv1.1_{nss}}{\tau_{actKv1.1}}$$

$$Kv1.1_{nss} = \frac{\delta_{Kv1.1}}{1 + e^{\left(\frac{V_{mKv1.1} - V_m}{k_{actKv1.1}}\right)}}$$

$$I_{Kv1.1} = I_{maxKv1.1} \cdot Kv1.1_n^2 \cdot (V_m - V_K)$$

### 10. Voltage-gated A-type K<sup>+</sup> channel

$$\frac{dKa_n}{dt} = \frac{-Ka_n + Ka_{nss}}{\tau_{nKa}}$$

$$\frac{dKa_{hfast}}{dt} = \frac{-Ka_{hfast} + Ka_{hfastss}}{\tau_{hfastKa}}$$

$$\frac{dKa_{hslow}}{dt} = \frac{-Ka_{hslow} + Ka_{hslowss}}{\tau_{hslowKa}}$$

$$Ka_{nss} = \frac{1}{1 + e^{\left(\frac{-V_m - 40.8}{9.5}\right)}}$$

$$Ka_{hfastss} = \frac{1}{1 + e^{\left(\frac{V_m + 74.2}{9.6}\right)}}$$

$$\tau_{nKa} = 1.2 + 2.56 \cdot e^{-2 \cdot \left(\frac{V_m + 60}{45.768}\right)^2}$$

$$\tau_{hfastKa} = 25.46 + 67.41 \cdot e^{-2 \cdot \left(\frac{V_m + 50}{21.95}\right)^2}$$

$$\tau_{hslowKa} = 200 + 587.4 \cdot e^{-\left(\frac{V_m}{47.77}\right)^2}$$

$$I_{K_a} = I_{\max_{K_a}} \cdot K_{a_n} \cdot (0.3K_{a_{\text{hfast}}} + 0.7K_{a_{\text{hslow}}}) \cdot (V_m - V_K)$$

### 11. Large-conductance $\text{Ca}^{2+}$ -activated $\text{K}^+$ channel

$$\frac{dBKCa_n}{dt} = \frac{-BKCa_n + BKCa_{\text{nss}}}{\tau_{nBKCa}}$$

$$p_{Ca} = \log_{10} \cdot (\text{Ca}_i \cdot e^{-3})$$

$$\text{kact}_{BKCa} = (-43.4 \cdot p_{Ca}) - 203$$

$$\text{sf}_{BKCa} = 33.88 \cdot e^{-(p_{Ca} + 5.42)/1.85^2}$$

$$BKCa_{\text{nss}} = \frac{1}{1 + e^{\left(\frac{\text{kact}_{BKCa} - V_m}{\text{sf}_{BKCa}}\right)}}$$

$$\tau_{nBKCa} = 5.55 \cdot e^{42.91 + 0.75 - (0.12 \cdot V_m)}$$

$$I_{BKCa} = I_{\max_{BKCa}} \cdot BKCa_n^2 \cdot (V_m - V_K)$$

### 12. T-type voltage-gated $\text{Ca}^{2+}$ channel

$$\frac{dCaT_m}{dt} = \frac{-CaT_m + CaT_{\text{mss}}}{\tau_{\text{act}_{CaT}}}$$

$$\frac{dCaT_h}{dt} = \frac{-CaT_h + CaT_{\text{hss}}}{\tau_{\text{inact}_{CaT}}}$$

$$CaT_{\text{mss}} = \frac{1}{1 + e^{\left(\frac{V_m - V_{mCaT}}{\text{kact}_{CaT}}\right)}}$$

$$CaT_{\text{hss}} = 1 - \frac{1}{1 + e^{\left(\frac{V_m - V_{hCaT}}{\text{kinact}_{CaT}}\right)}}$$

$$I_{CaT} = I_{\max_{CaT}} \cdot CaT_m^2 \cdot CaT_h \cdot (V_m - V_{Ca})$$

### 13. L-type voltage-gated $\text{Ca}^{2+}$ channel

$$\frac{dCaL_m}{dt} = \frac{-CaL_m + CaL_{\text{mss}}}{\tau_{\text{act}_{CaL}}}$$

$$\frac{dCaL_h}{dt} = \frac{-CaL_h + CaL_{\text{hss}}}{\tau_{\text{inact}_{CaL}}}$$

$$CaL_{mss} = \frac{1}{1 + e^{\left(\frac{Vm_{CaL} - V_m}{kact_{CaL}}\right)}}$$

$$CaL_{hss} = 1 - \frac{1}{1 + e^{\left(\frac{Vh_{CaL} - V_m}{kinact_{CaL}}\right)}}$$

$$hCa_{CaL} = \frac{1}{1 + (Ca_i / 1e^{-6})^4}$$

$$I_{CaL} = I_{max_{CaL}} \cdot CaL_m \cdot CaL_h \cdot hCa_{CaL} \cdot (V_m - V_{Ca})$$

#### 14. NaK pump

$$I_{NaK} = I_{max_{NaK}} \cdot \frac{K_o^2}{K_o^2 + K K_{NaK}^2} \cdot \frac{Na_i^{nH_{Na}}}{Na_i^{nH_{Na}} + K Na_{NaK}^{nH_{Na}}} \cdot \frac{V_m + 70}{V_m + 180}$$

#### 15. PMCA pump

$$I_{PMCA} = I_{max_{PMCA}} \cdot \frac{Ca_i}{Ca_i + K C_{aPMCA}}$$

#### 16. Na<sup>+</sup>-Ca<sup>2+</sup> exchanger

$$kqa = e^{\frac{0.35 \cdot V_m}{k_{NCX}}}$$

$$kb_{NCX} = e^{\frac{-0.65 \cdot V_m}{k_{NCX}}}$$

$$I_{NCX} = I_{max_{NCX}} \cdot (kqa \cdot Na_i^3 \cdot Ca_o) - \frac{kb_{NCX} \cdot Ca_i \cdot Na_o^3}{(kNa^3 + Na_o^3) \cdot (kCa + Ca_o) \cdot (1 + 0.1kb_{NCX})}$$

#### 17. Passive K<sup>+</sup> leak channel

$$I_{Kleak} = I_{max_{Kleak}} \cdot (V_m - (-45))$$

### ER mechanisms

#### 1. IP<sub>3</sub> receptor flux

$$\frac{dhIP_3}{dt} = kf_{IP_3} \cdot (kb_{IP_3} - (Ca_i + kb_{IP_3}) \cdot hIP_3)$$

$$I_{IP3R} = I_{maxIP3R} \cdot \left( \frac{IP_3}{IP_3 + k_{IP3}} \right) \cdot \left( \frac{Ca_i}{Ca_i + k_{CaIP3}} \cdot hIP_3 \right)^3 \cdot \left( 1 - \frac{Ca_i}{Ca_{ER}} \right)$$

## 2. SERCA pump

$$I_{SERCA} = I_{maxSERCA} \cdot \left( \frac{Ca_i^2}{Ca_i^2 + K_{CaSERCA}} \right)$$

## 3. ER leak current

$$I_{leakER} = 5 \times 10^{-7} \cdot \left( 1 - \frac{Ca_i}{Ca_{ER}} \right)$$

$$I_{leakER} = I_{maxERleak} \cdot \left( 1 - \frac{Ca_i}{Ca_{ER}} \right) \quad \text{if } Ca_i > K_{TCa}$$

## 4. Ryanodine receptor flux

$$I_{CICR} = I_{maxCICR} \cdot \left( \frac{Ca_i}{Ca_i + K_{CaCICR}} \right) \cdot (Ca_{ER} - Ca_i) \quad \text{if } Ca_i > K_{TCa}$$

$$I_{CICR} = 0$$

## 5. $Ca_i^{2+}$ buffering in cytosol and ER

$$\beta_{ER} = \frac{CSQN \cdot K_{CSQN}}{(K_{CSQN} + Ca_{ER})^2}$$

## 6. PKC activation and signaling

$$\frac{d[RG_s]}{dt} = k_{rG} \cdot \epsilon_{rG} \cdot [RTG] - \left( k_{rG} + \frac{k_{pG} \cdot [PGE_2]}{(K_{1G} + [PGE_2])} \right) \cdot [RG_s] - k_{rG} [RPG_s]$$

$$\frac{d[RPG_s]}{dt} = [PGE_2] \cdot \left( \frac{k_{pG} \cdot [RG_s]}{(K_{1G} + [PGE_2])} \right) \cdot \left( \frac{k_{eG} \cdot [RPG_s]}{(K_{2G} + [PGE_2])} \right)$$

$$\rho_{rG} = \alpha_G \left( \frac{[PGE_2] \cdot [RG_s]}{\epsilon_{rG} \cdot [RTG] \cdot (K_{1G} + [PGE_2])} \right)$$

$$\frac{d[G_{aq}]}{dt} = k_a (\delta + \rho_{rG}) ([G_T] - [G_{aq}]) - k_d [G_{aq}]$$

$$r_{hG} = \alpha_G \left( \frac{[Ca^{2+}]_i}{[Ca^{2+}]_i + k_{cG}} \right) G$$

$$\frac{d[PIP_2]}{dt} = -(r_{hG} + r_{rG})[PIP_2] - r_{rG} \cdot \Upsilon_G [IP_3] + r_{rG} [PIP_{2T}]$$

$$\frac{d[IP_3]}{dt} = \frac{r_{hG}}{\Upsilon_G} [PIP_2] - k_{degG} [IP_3]$$

$$\frac{d[PLC_{inact}]}{dt} = -(k_{PLCinact})[PLC_{act}] - k_{PLCact} \cdot [PLC_{inact3}] \cdot [G_{aq}]$$

$$\frac{d[PLC_{act}]}{dt} = k_{PLCact} \cdot [PLC_{inact3}] \cdot [G_{aq}] - (k_{PLCinact})[PLC_{act}]$$

$$\frac{d[DAG]}{dt} = k_{hyd} \cdot [PIP_2] \cdot [PLC_{act}] - k_{deg} [DAG] - k_{actPKC} [DAG] \cdot [PKC_{inact}] + (k_{inactPKC}) [PKC_{act}] + k_{off} [DAG\_PKC]$$

$$\frac{d[PKC_{inact}]}{dt} = -k_{actPKC} \cdot [PKC_{inact}] \cdot [DAG] + k_{inactPKC} [PKC_{act}] + k_{off} [DAG\_PKC]$$

$$\frac{d[DAG\_PKC]}{dt} = k_{dp} [PKC_{act}] - k_{off} [DAG\_PKC]$$

$$\frac{d[PKC_{act}]}{dt} = k_{actPKC} \cdot [PKC_{inact}] \cdot [DAG] - k_{inactPKC} [PKC_{act}] - k_{dp} [PKC_{act}]$$

## 7. PKA activation and signaling

$$GPCR_{act} = \alpha_G \left( \frac{PGE_2 \cdot [GPCR_{tot}]}{PGE_2 + k_{EPdiss}} \right)$$

$$\frac{d[G_{as}]}{dt} = k1_{Gas} [GPCR_{act}] \cdot \left( \frac{[G_{\alpha\beta\gamma}]}{(K_{EPdiss} + [G_{\alpha\beta\gamma}])} \right) - k2_{Gas} [G_{as}]$$

$$[Gas_{inact}] = [Gas_{tot}] - [G_{as}] - [G_{\alpha\beta\gamma}]$$

$$\frac{d[G_{\alpha\beta\gamma}]}{dt} = -k1_{Gas} [GPCR_{act}] \cdot \left( \frac{[G_{\alpha\beta\gamma}]}{(K_{EPdiss} + [G_{\alpha\beta\gamma}])} \right) + k3_{Gas} [G_{\beta\gamma}] [G_{as}] - k4_{Gas} [G_{\alpha\beta\gamma}]$$

$$\frac{d[G_{\beta\gamma}]}{dt} = k1_{Gas} [GPCR_{act}] \cdot \left( \frac{[G_{\alpha\beta\gamma}]}{(K_{EPdiss} + [G_{\alpha\beta\gamma}])} \right) - k3_{Gas} [G_{\beta\gamma}] [G_{as}] + k4_{Gas} [G_{\alpha\beta\gamma}]$$

$$[AC_{act}] = \frac{[AC_{tot}] \cdot [G_{as}]}{[G_{as}] + k_{ACdiss}}$$

$$[AC_{inact}] = [AC_{tot}] - [AC_{act}]$$

$$\frac{d[\text{cAMP}]}{dt} = \left( \frac{k5_{\text{Gas}}[\text{AC}_{\text{act}}]}{k_{\text{AC}}\beta_{\text{y}}\text{diss} + [\text{G}_{\beta\text{y}}]} \right) + k6_{\text{Gas}}[\text{AC}_{\text{act}}] - k_{\text{degcAMP}}[\text{cAMP}]$$

$$\frac{d[\text{RC}]}{dt} = -k_{\text{fPKA}}[\text{RC}] \cdot [\text{cAMP}]^2 + k_{\text{bPKA}}[\text{RC}_{\text{cAMP2}}]$$

$$\frac{d[\text{RC}_{\text{cAMP2}}]}{dt} = k_{\text{fPKA}}[\text{RC}] \cdot [\text{cAMP}]^2 - k_{\text{bPKA}}[\text{RC}_{\text{cAMP2}}] - k_{\text{f9}}[\text{RC}_{\text{cAMP2}}] \cdot [\text{cAMP}]^2 + k_{\text{b9}}[\text{RC}_{\text{cAMP4}}]$$

$$\frac{d[\text{RC}_{\text{cAMP4}}]}{dt} = k_{\text{f9}}[\text{RC}_{\text{cAMP2}}] \cdot [\text{cAMP}]^2 - k_{\text{b9}}[\text{RC}_{\text{cAMP4}}] - k_{\text{f10}}[\text{RC}_{\text{cAMP4}}] + k_{\text{b10}}[\text{RC}_{\text{cAMP}}] \cdot [\text{PKA}]^2$$

$$\frac{d[\text{RC}_{\text{cAMP}}]}{dt} = k_{\text{f10}}[\text{RC}_{\text{cAMP4}}] - k_{\text{b10}}[\text{RC}_{\text{cAMP}}] \cdot [\text{PKA}]^2$$

$$\frac{d[\text{PKA}]}{dt} = 2k_{\text{f10}}[\text{RC}_{\text{cAMP4}}] - k_{\text{b10}}[\text{RC}_{\text{cAMP}}] \cdot [\text{PKA}]^2$$

## 8. Equations for sensitization of nociceptor

First, we used the two equations shown below to compute the magnitude of change ( $\Delta V_m$  for Nav1.7, Nav1.8, and Kv1.1, and  $\Delta \text{Mech}$  for TRPA1) induced by PKC and PKA:

$$\Delta V_{\text{mPKC}} \text{ or } \Delta \text{Mech}_{\text{PKC}} = \frac{15}{1 + e^{\frac{k_{\text{halfPKC}} - [\text{PKC}]}{k_{\text{slopePKC}}}}}$$

$$\Delta V_{\text{mPKA}} \text{ or } \Delta \text{Mech}_{\text{PKA}} = \frac{13}{1 + e^{\frac{k_{\text{halfPKA}} - [\text{PKA}]}{k_{\text{slopePKA}}}}}$$

where  $[\text{PKC}]$  and  $[\text{PKA}]$  denote the instantaneous concentrations of PKC and PKA (zero in the absence of an inflammatory mediator), respectively, and  $k_{\text{halfPKC}}$ ,  $k_{\text{halfPKA}}$ ,  $k_{\text{slopePKC}}$ , and  $k_{\text{slopePKA}}$  denote the phosphorylation and steepness factors for PKC and PKA (Nicol et al., 1997; Wu et al., 2012). Next, we computed the new values of the activation and inactivation thresholds for each of the four ion channels using the following equations:

$$\left. \begin{aligned} V_{\text{act}_{\text{new}_i}} &= V_{\text{act}_i} - \Delta V_{\text{mPKC}} - \Delta V_{\text{mPKA}} \\ V_{\text{inact}_{\text{new}_i}} &= V_{\text{inact}_i} + \Delta V_{\text{mPKC}} + \Delta V_{\text{mPKA}} \end{aligned} \right\} \text{Inflammatory mediator} > 0$$

$$\left. \begin{aligned} V_{\text{act}_{\text{new}_i}} &= V_{\text{act}_i} + \Delta V_{\text{mPKC}} + \Delta V_{\text{mPKA}} \\ V_{\text{inact}_{\text{new}_i}} &= V_{\text{inact}_i} - \Delta V_{\text{mPKC}} - \Delta V_{\text{mPKA}} \end{aligned} \right\} \text{Inflammatory mediator} = 0$$

where  $i$  denotes one of the four channels, i.e., TRPA1, Nav1.7, Nav1.8, and Kv1.1,  $V_{\text{act}_{\text{new}_i}}$  and  $V_{\text{inact}_{\text{new}_i}}$  denote the new values, and  $V_{\text{act}_i}$  and  $V_{\text{inact}_i}$  denote the nominal values, respectively, of the activation and inactivation thresholds for each of the four channels.

## 9. ODEs for change in the activation and inactivation variables of Nav1.7, Nav1.8, Kv1.1, and TRPA1

$$\frac{d[V_{\text{hact}}^{\text{TTXs}}]}{dt} = \left( \frac{V_{\text{act\_new}} - V_{\text{hact}}^{\text{TTXs}}}{\tau_{\text{Navphos}}} \right)$$

$$\frac{d[V_{\text{hinact}}^{\text{TTXs}}]}{dt} = \left( \frac{V_{\text{inact\_new}} - V_{\text{hinact}}^{\text{TTXs}}}{\tau_{\text{Navphos}}} \right)$$

$$\frac{d[V_{\text{hact}}^{\text{TTXr}}]}{dt} = \left( \frac{V_{\text{act\_new}} - V_{\text{hact}}^{\text{TTXr}}}{\tau_{\text{Navphos}}} \right)$$

$$\frac{d[V_{\text{hinact}}^{\text{TTXr}}]}{dt} = \left( \frac{V_{\text{inact\_new}} - V_{\text{hinact}}^{\text{TTXr}}}{\tau_{\text{Navphos}}} \right)$$

$$\frac{d[V_{\text{hact}}^{\text{Kv1.1}}]}{dt} = \left( \frac{V_{\text{act\_new}} - V_{\text{hact}}^{\text{Kv1.1}}}{\tau_{\text{Kv1.1phos}}} \right)$$

$$\frac{d[\text{TRPA1}_{aM}]}{dt} = \left( \frac{V_{\text{act\_new}} - \text{TRPA1}_{aM}}{\tau_{\text{TRPA1phos}}} \right)$$

## Nernst potential calculations

$$V_{\text{Na}} = \frac{R \cdot T}{z_{\text{Na}} \cdot F} \cdot \log \left( \frac{\text{Na}_o}{\text{Na}_i} \right)$$

$$V_{\text{K}} = \frac{R \cdot T}{z_{\text{K}} \cdot F} \cdot \log \left( \frac{\text{K}_o}{\text{K}_i} \right)$$

$$V_{\text{Ca}} = \frac{R \cdot T}{z_{\text{Ca}} \cdot F} \cdot \log \left( \frac{\text{Ca}_o}{\text{Ca}_i} \right)$$

## Ionic balances

$$\frac{d\text{Ca}_i}{dt} = \frac{-(I_{\text{CaT}} + I_{\text{CaL}} + I_{\text{PMCA}} - 2I_{\text{NCX}} + I_{\text{PiezoCa}}) / (z_{\text{Ca}} \cdot F \cdot 0.7 \text{vol}) - I_{\text{SERCA}} - I_{\text{leakER}} - I_{\text{IP3}} - I_{\text{CICR}}}{(1/(1+370))}$$

$$\frac{d\text{Ca}_{\text{ER}}}{dt} = \frac{I_{\text{SERCA}} - I_{\text{leakER}} - I_{\text{IP3}} - I_{\text{CICR}}}{\beta_{\text{ER}}}$$

$$\frac{d\text{Na}_i}{dt} = \frac{-(I_{\text{Nav1.8}} + I_{\text{Nav1.9}} + I_{\text{Nav1.7}} + I_{\text{PiezoNa}} + I_{\text{TRPA1}} + 3I_{\text{NaK}} + 3I_{\text{NCX}}) / (z_{\text{Na}} \cdot F \cdot \text{vol})}{}$$

$$\frac{d\text{K}_i}{dt} = \frac{-(I_{\text{TREK1}} + I_{\text{Kv7.2}} + I_{\text{Kv1.1}} + I_{\text{BKCa}} + I_{\text{Ka}} + I_{\text{Kleak}} - 2I_{\text{NaK}}) / (z_{\text{K}} \cdot F \cdot \text{vol})}{}$$



## References

- Bennett, M.R., Farnell, L., and Gibson, W.G. (2005). A quantitative description of the contraction of blood vessels following the release of noradrenaline from sympathetic varicosities. *J Theor Biol* 234(1), 107-122. doi: 10.1016/j.jtbi.2004.11.013.
- Gold, M.S., and Flake, N.M. (2005). Inflammation-mediated hyperexcitability of sensory neurons. *Neurosignals* 14(4), 147-157. doi: 10.1159/000087653.
- Kapela, A., Bezerianos, A., and Tsoukias, N.M. (2008). A mathematical model of  $Ca^{2+}$  dynamics in rat mesenteric smooth muscle cell: agonist and NO stimulation. *J Theor Biol* 253(2), 238-260. doi: 10.1016/j.jtbi.2008.03.004.
- Leander, R., and Friedman, A. (2014). Modulation of the cAMP response by G $\alpha$ i and G $\beta\gamma$ : a computational study of G protein signaling in immune cells. *Bull Math Biol* 76(6), 1352-1375. doi: 10.1007/s11538-014-9964-4.
- Li, Z.H., Cui, D., Qiu, C.J., and Song, X.J. (2019). Cyclic nucleotide signaling in sensory neuron hyperexcitability and chronic pain after nerve injury. *Neurobiol Pain* 6, 100028. doi: 10.1016/j.ynpai.2019.100028.
- Lindskog, M., Kim, M., Wikstrom, M.A., Blackwell, K.T., and Kotaleski, J.H. (2006). Transient calcium and dopamine increase PKA activity and DARPP-32 phosphorylation. *PLoS Comput Biol* 2(9), e119. doi: 10.1371/journal.pcbi.0020119.
- Mohan, K., Nosbisch, J.L., Elston, T.C., Bear, J.E., and Haugh, J.M. (2017). A reaction-diffusion model explains amplification of the PLC/PKC pathway in fibroblast chemotaxis. *Biophys J* 113(1), 185-194. doi: 10.1016/j.bpj.2017.05.035.
- Nagaraja, S., Queme, L.F., Hofmann, M.C., Tewari, S.G., Jankowski, M.P., and Reifman, J. (2021). *In silico* identification of key factors driving the response of muscle sensory neurons to noxious stimuli. *Front Neurosci* 15, 719735. doi: 10.3389/fnins.2021.719735.
- Nicol, G.D., Vasko, M.R., and Evans, A.R. (1997). Prostaglandins suppress an outward potassium current in embryonic rat sensory neurons. *J Neurophysiol* 77(1), 167-176. doi: 10.1152/jn.1997.77.1.167.
- Wu, D.F., Chandra, D., McMahon, T., Wang, D., Dadgar, J., Kharazia, V.N., et al. (2012). PKC $\epsilon$  phosphorylation of the sodium channel Nav1.8 increases channel function and produces mechanical hyperalgesia in mice. *J Clin Invest* 122(4), 1306-1315. doi: 10.1172/JCI61934.
